# Supplementary material for: Insulin receptor substrate 2 (IRS2) deficiency delays liver fibrosis associated with cholestatic injury
Source: PubMed Central journal article supplement (PMC6679376; doi:10.1242/dmm.038810), 2019-07-16
Supplement: dmm-12-038810-s1.pdf [file dmm-12-038810-s1.pdf]

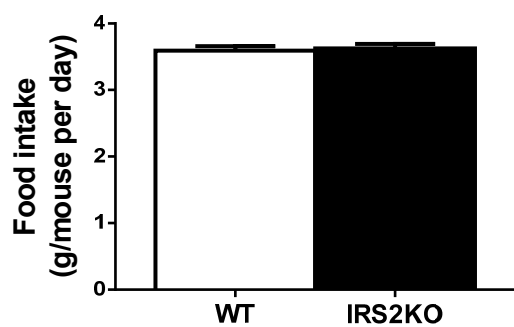

**Figure S1.** Mean daily food intake. Experimental groups: Wild-type (WT) and *Irs2*-deficient (IRS2KO) female mice (n=8 animals per condition).

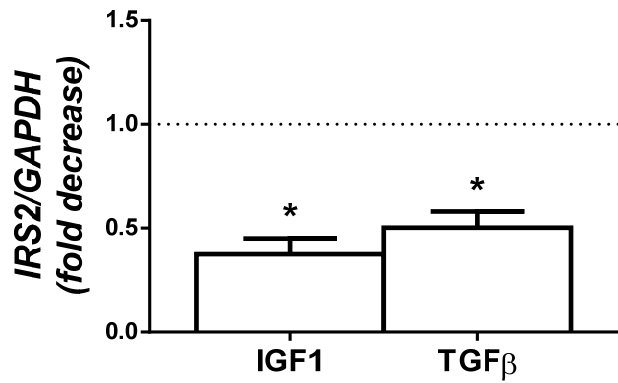

**Figure S2.** LX2 cells were treated with 10 nM IGF1 or 5 ng/ml TGFβ for 24 h. *IRS2* mRNA levels determined by RT-qPCR. Statistical significance was carried out by unpaired two-tailed Student's t-test: \* $p < 0.05$ , IGF1 or TGFβ vs. untreated cells (n=3 independent experiments performed in duplicate).

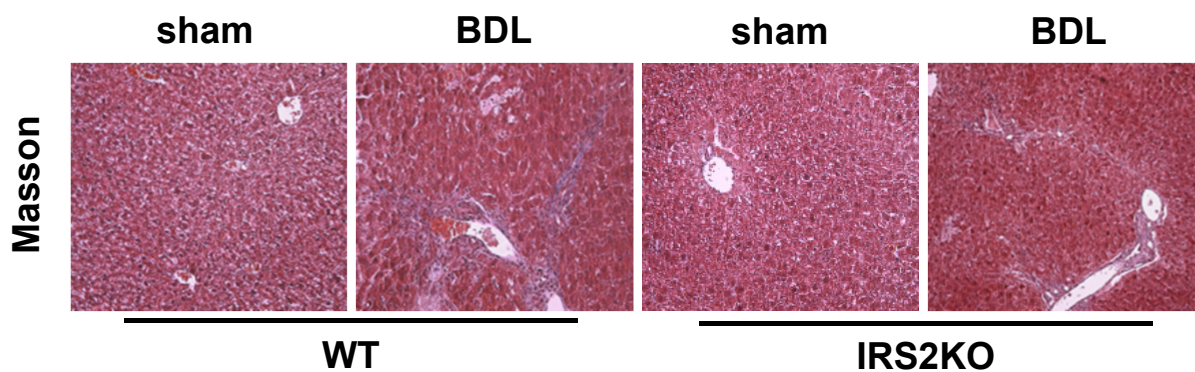

**Figure S3.** Representative images (20x) from Masson's trichrome staining. Experimental groups: Wild-type (WT) and *Irs2*-deficient (IRS2KO) female mice submitted to BDL and analyzed 28 days after surgery (n=8 animals per condition).

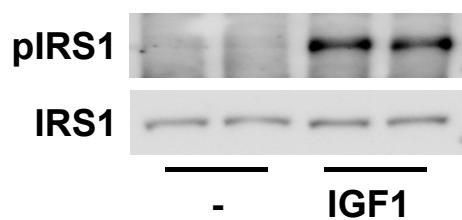

**Figure S4.** LX2 cells were treated with 10 nM IGF1 for 15 min and IRS1 tyrosine phosphorylation was analyzed by Western Blot. Representative images are shown (n=3 independent experiments performed in duplicate).

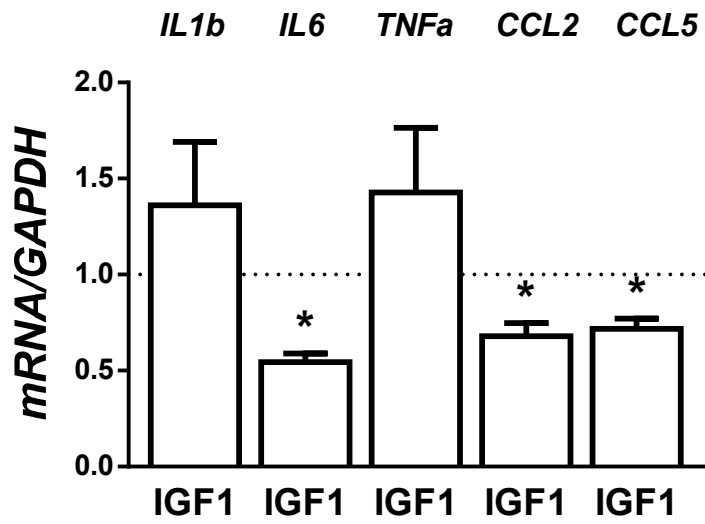

**Figure S5.** LX2 cells were treated with 10 nM IGF1 for 24 h. mRNA levels of pro-inflammatory cytokines determined by RT-qPCR. Statistical significance was carried out by unpaired two-tailed Student's t-test: \* $p < 0.05$ , IGF1 vs. untreated cells (n=3 independent experiments performed in duplicate).

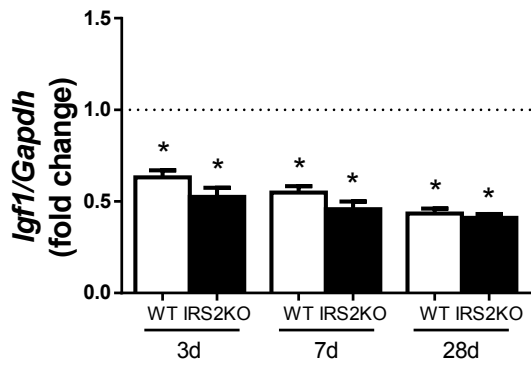

**Figure S6.** *Igf1* mRNA levels determined by RT-qPCR. Experimental groups: Wild-type (WT) and *Irs2*-deficient (IRS2KO) female mice submitted to BDL and analyzed at the indicated time-periods. Statistical significance was carried out by one-way ANOVA with Bonferroni post-test:

\* $p < 0.05$ , BDL vs. Sham (n=6-8 animals per condition).

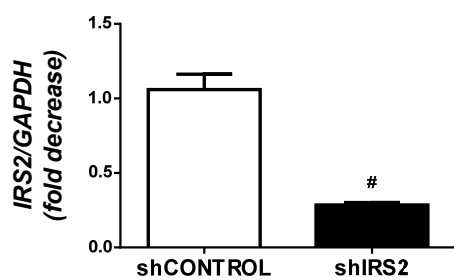

**Figure S7.** LX2 cells infected with scrambled (shC) or IRS2 shRNA (shIRS2) lentiviral particles. *IRS2* mRNA levels determined by RT-qPCR. Statistical significance was carried out by unpaired two-tailed Student's t-test: # $p < 0.05$ , shIRS2KO vs. shC (n=4 independent experiments performed in duplicate).

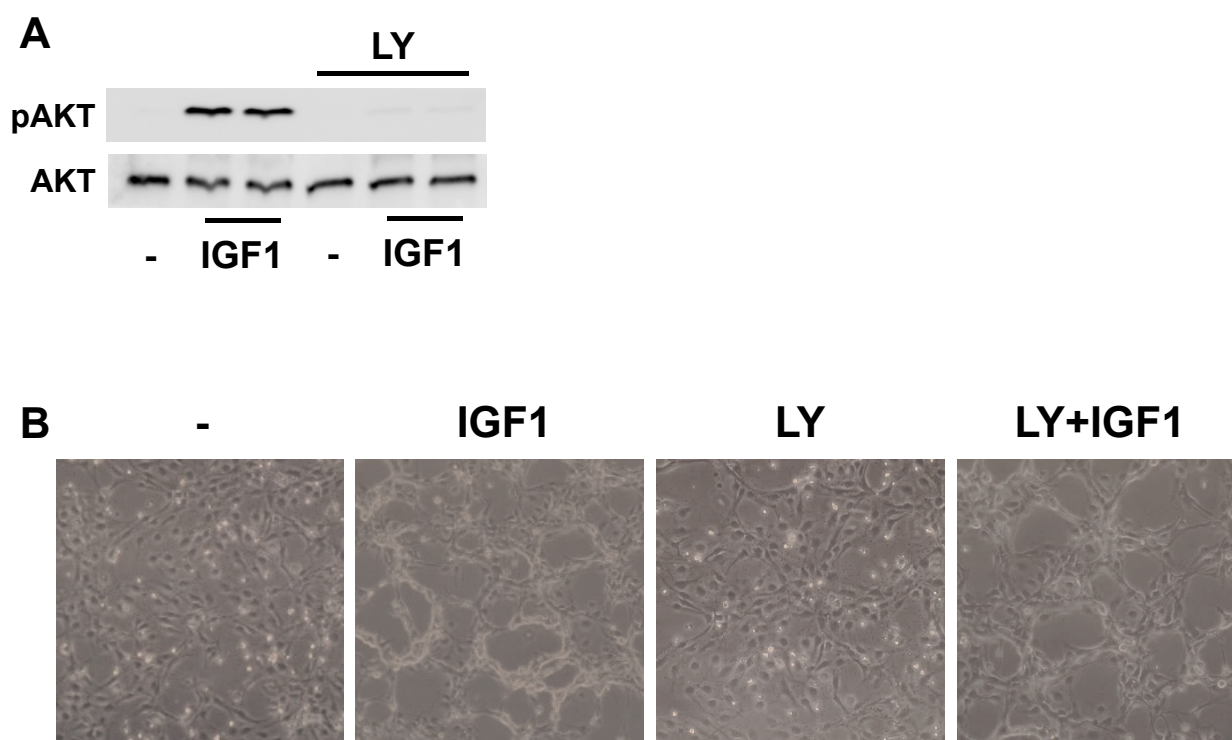

**Figure S8.** LX2 cells were pretreated with 25  $\mu$ M LY294002 for 2 h prior to 10 nM IGF1 stimulation for 15 min (A) or 24 h (B). **A.** Representative Western blot with the indicated antibodies. **B.** Representative phase-contrast images. (n=3 independent experiments performed in duplicate).



**Table S1. Primer sequences for RT-qPCR.**

|                 |         |                          |
|-----------------|---------|--------------------------|
| <i>m-Gapdh</i>  | Forward | TGGAAGAGTGGGAGTTGCTGT    |
|                 | Reverse | CCTGGAGAAACCTGCCAAGTA    |
| <i>m-Acta2</i>  | Forward | CCCAGACATCAGGGAGTAATGG   |
|                 | Reverse | TCTATCGGATACTTCAGCGTCA   |
| <i>m-Mmp9</i>   | Forward | AAACCTTCAAAGGCCTCAAGTG   |
|                 | Reverse | GTCTCGCGGCAAGTCTTCAG     |
| <i>m-Pai1</i>   | Forward | ATGACTGGGTGGAAAGGCATAC   |
|                 | Reverse | CAGGCGTGTCAGCTCGTCTA     |
| <i>m-Hmox1</i>  | Forward | CACAGATGGCGTCACTTCGTC    |
|                 | Reverse | GTGAGGACCCACTGGAGGAG     |
| <i>m-Il6</i>    | Forward | GAGGATACCACTCCCAACAGACC  |
|                 | Reverse | AAGTGCATATCGTTGTTTCATACA |
| <i>m-Il1b</i>   | Forward | AGAAGCTGTCGCAGGTACCTG    |
|                 | Reverse | GGAAAAGAAGGTGCTCATGTCC   |
| <i>m-Tnfa</i>   | Forward | CATCTTCTCAAATTCGAGTGACAA |
|                 | Reverse | TGGGAGTAGACAAGGTACAACCC  |
| <i>m-Irs2</i>   | Forward | CACGAGCCCCTAGTTGTCAT     |
|                 | Reverse | ACCGACTTGGTCAGCGAAG      |
| <i>m-Col1a1</i> | Forward | TAGGCCATTGTGTATGCAGC     |
|                 | Reverse | ACATGTTTCAGCTTTGTGGACC   |
| <i>m-Igf1</i>   | Forward | TCAACAAGCCCACAGGCTATG    |
|                 | Reverse | GCTCCGGAAGCAACTCAT       |
| <i>h-IRS2</i>   | Forward | CAGTGCTGAGCGTCTTCTTTT    |
|                 | Reverse | ACCTACGCCAGCATTGACTT     |
| <i>h-IL1b</i>   | Forward | TGAGCACCTTCTTTCCCTTCA    |
|                 | Reverse | GTAGTGGTGGTCGGAGATTCCG   |
| <i>h-IL6</i>    | Forward | CCTGACCCAACCACAAATGC     |
|                 | Reverse | CCTTAAAGCTGCGCAGAATGA    |
| <i>h-TNFA</i>   | Forward | TCGAACCCCGAGTGACAAG      |
|                 | Reverse | TTGGCCAGGAGGGCATT        |
| <i>h-CCL2</i>   | Forward | GAAGAATCACCAGCAGCAAGTG   |
|                 | Reverse | CAGATCTCCTTGCCACAATG     |
| <i>h-CCL5</i>   | Forward | CGTGCCACATCAAGGAGTA      |
|                 | Reverse | CGGTTCTTTCGGGTGACAAA     |
| <i>h-GAPDH</i>  | Forward | GAAGGTGAAGGTCGGAGT       |
|                 | Reverse | CATGGGTGGAATCATATTGGAA   |
